# Supplementary material for: Comparative Genomic and Phylogenetic Analysis of Chloroplast Genomes of Hawthorn (Crataegus spp.) in Southwest China
Source: Front Genet. 2022 Jul 4;13:900357. doi: 10.3389/fgene.2022.900357 (PMC9289535; doi:10.3389/fgene.2022.900357)
Supplement: Supplementary file 3 [file Table3.xlsx]

## Sheet: Sheet1
Table S3 Information and sources of sequences of 50 species in the phylogenetic tree.
Species	GenBank accession	Size (bp)	locality	Title	Doi
Crataegus chungtienensis	ON032469	159847	Yunnan, China	This study
Crataegus oresbia	ON032471	159851	Yunnan, China	This study
Crataegus kansuensis	NC_039374.1	159865	China	The complete chloroplast genome of the Crataegus kansuensis (Rosaceae): characterization and phylogeny	10.1080/23802359.2020.1792368
Crataegus marshallii	MK920293	159660	American	Phylogenomic analyses of the Photinia complex support the recognition of a new genus Phippsiomeles and the resurrection of a redefined Stranvaesia in Maleae (Rosaceae)	10.1111/jse.12542
Crataegus scabrifoli	ON032471	159742	Yunnan, China	This study
Crataegus pinnatifida	NC_057086.1	159898	Yunnan, China	Chloroplast genome for Crataegus pinnatifida (Rosaceae) and phylogenetic analyses with its coordinal species	10.1080/23802359.2019.1667273
Crataegus pinnatifida var. major	MW653326.1	159654	Beijing, China	Identifcation and phylogenetic analysis of fve Crataegus species (Rosaceae) based on complete chloroplast genomes	10.1007/s00425-021-03667-4
Crataegus hupehensis	NC_054155.1	159766	Beijing, China	Crataegus hupehensisThe complete chloroplast genome of Sarg. (Rosaceae), a medicinal and edible plant in China	10.1080/23802359.2020.1866464
Crataegus cuneata	NC_058896.1	159730
Amelanchier alnifolia	NC_045314.1	159841	American	Phylogenetic relationships and chloroplast capture in the Amelanchier_x0002_Malacomeles-Peraphyllum clade (Maleae, Rosaceae): Evidence from chloroplast genome and nuclear ribosomal DNA data using genome skimming	10.1016/j.ympev.2020.106784
Amelanchier pallida	NC_045319.1	159838	American	Phylogenetic relationships and chloroplast capture in the Amelanchier_x0002_Malacomeles-Peraphyllum clade (Maleae, Rosaceae): Evidence from chloroplast genome and nuclear ribosomal DNA data using genome skimming	10.1016/j.ympev.2020.106784
Amelanchier cusickii	NC_045316.1	159785	American	Phylogenetic relationships and chloroplast capture in the Amelanchier_x0002_Malacomeles-Peraphyllum clade (Maleae, Rosaceae): Evidence from chloroplast genome and nuclear ribosomal DNA data using genome skimming	10.1016/j.ympev.2020.106784
Stranvaesia oblanceolata	MK920280.1	159808	China	Phylogenomic analyses of the Photinia complex support the recognition of a new genus Phippsiomeles and the resurrection of a redefined Stranvaesia in Maleae (Rosaceae)	10.1111/jse.12542
Stranvaesia nussia	MK920284.1	159937	American	Phylogenomic analyses of the Photinia complex support the recognition of a new genus Phippsiomeles and the resurrection of a redefined Stranvaesia in Maleae (Rosaceae)	10.1111/jse.12542
Eriobotrya japonica	NC_034639.1	159137	Zhejiang, China	Complete plastid genome of Eriobotrya japonica (Thunb.) Lindl and comparative analysis in Rosaceae	10.1186/s40064-016-3702-3
Eriobotrya obovata	NC_045347.1	157229	China	Eriobotrya Belongs to Rhaphiolepis (Maleae, Rosaceae): Evidence From Chloroplast Genome and Nuclear Ribosomal DNA Data	10.3389/fpls.2019.01731
Eriobotrya salwinensis	NC_045348.1	159488	China	Eriobotrya Belongs to Rhaphiolepis (Maleae, Rosaceae): Evidence From Chloroplast Genome and Nuclear Ribosomal DNA Data	10.3389/fpls.2019.01731
Cotoneaster acuminatus	NC_045340.1	159524	China	Phylogenomic analyses based on genome-skimming data reveal cyto-nuclear discordance in the evolutionary history of Cotoneaster (Rosaceae)	10.1016/j.ympev.2021.107083
Cotoneaster rubens	NC_045359.1	159525	China	Phylogenomic analyses based on genome-skimming data reveal cyto-nuclear discordance in the evolutionary history of Cotoneaster (Rosaceae)	10.1016/j.ympev.2021.107083
Cotoneaster silvestrii	NC_045358.1	159796	China	Phylogenomic analyses based on genome-skimming data reveal cyto-nuclear discordance in the evolutionary history of Cotoneaster (Rosaceae)	10.1016/j.ympev.2021.107083
Sorbus ulleungensis	NC_037022.1	159632	Ulleung Island, Korea	The plastome sequence of Ulleung Rowan, Sorbus ulleungensis (Rosaceae), a new endemic species on Ulleung Island, Korea	10.1080/23802359.2018.1443042
Sorbus setschwanensis	NC_046777.1	160064	Sichuan, China	The complete chloroplast genome sequence of the Chinese endemic species Sorbus setschwanensis (Rosaceae) and its phylogenetic analysis	10.1111/njb.02532
Docynia indica	MN088849.1	159546	Yunnan, China	The complete chloroplast genome sequence of Docynia indica (Wall.) Decne	10.1080/23802359.2019.1666669
Docynia delavayi	NC_045424.1	159786	China	Phylogenomic analyses of the Photinia complex support the recognition of a new genus Phippsiomeles and the resurrection of a redefined Stranvaesia in Maleae (Rosaceae)	10.1111/jse.12542
Malus prunifolia	NC_031163.1	160041	Ulleung Island, Korea	Characterization of the complete chloroplast genome of the Chinese crabapple Malus prunifolia (Rosales: Rosaceae: Maloideae)	10.1007/s12686-016-0540-0
Malus micromalus	NC_036368.1	159834	Shaanxi, China	The complete plastid genome of the endangered species midget crabapple (Malus micromalus)	10.1007/s12686-017-0867-1
Chaenomeles japonica	NC_035566.1	160088
Chaenomeles cathayensis	NC_045392.1	159907	China	Phylogenomic analyses of the Photinia complex support the recognition of a new genus Phippsiomeles and the resurrection of a redefined Stranvaesia in Maleae (Rosaceae)	10.1111/jse.12542
Chaenomeles thibetica	NC_049863.1	159907	Xizang,China	Evolutionary and phylogenetic aspects of the chloroplast genome of Chaenomeles species	10.1038/s41598-020-67943-1
Osteomeles schwerinae	NC_045420.1	159930	china	Phylogenomic analyses of the Photinia complex support the recognition of a new genus Phippsiomeles and the resurrection of a redefined Stranvaesia in Maleae (Rosaceae)	10.1111/jse.12542
Osteomeles subrotunda	NC_053688.1	159902	Zhejiang China	Osteomeles subrotundaComplete chloroplast genome of a rare and endangered plant species : genomic features and phylogenetic relationships with other Rosaceae plants.	10.1080/23802359.2021.1881835
Spiraea blumei	MN418904.1	155957	Nanjing, China	The complete chloroplast genome sequence of Spiraea blumei G. Don (Rosaceae)	10.1080/23802359.2019.1678434
Spiraea mongolica	NC_051992.1	155949	Qinghai,China	The complete chloroplast genome of Spiraea mongolica Maxim	10.1080/23802359.2021.1926351
Spiraea insularis	NC_051503.1	158637	Ulleung Island, Korea	Characterization and Comparison of Two Complete Plastomes of Rosaceae Species ( Potentilla dickinsii var. glabrata and Spiraea insularis) Endemic to Ulleung Island, Korea	10.3390/ijms21144933
Prunus davidiana	NC_039735.1	158055	Shaanxi, China	Complete Chloroplast Genome Sequence Of Prunus Davidiana (Rosaceae)	10.1080/23802359.2018.1501325
Prunus salicina	NC_047442.1	157916
Prunus zippeliana	NC_043926.1	158940
Prinsepia uniflora	MZ270554	159179	Ningxia, China	The complete chloroplast genome of Prinsepia uniflora (Rosaceae), a medicinal plant found in northwest China	10.1080/23802359.2021.1978892
Prinsepia utilis	NC_021455.1	156328	Yunnan, China	Plastid Genome Sequence of a Wild Woody Oil Species, Prinsepia utilis, Provides Insights into Evolutionary and Mutational Patterns of Rosaceae Chloroplast Genomes	10.1371/journal.pone.0073946
Rosa multiflora	NC_039989.1	156592
Rosa cymosa	NC_051550.1	156607	Guangdong, China	The complete chloroplast genome of Rosa cymosa (Rosaceae), a traditional medicinal plant in South China	10.1080/23802359.2020.1781563
Rosa banksiae	NC_042194.1	156575
Potentilla freyniana	NC_041210.1	156381	Korea	The complete chloroplast genome of Potentilla Freyniana Bornm. (Rosaceae)	10.1080/23802359.2019.1565977
Potentilla dickinsii var. glabrata	NC_051504.1	155524	Ulleung Island, Korea	Characterization and Comparison of Two Complete Plastomes of Rosaceae Species ( Potentilla dickinsii var. glabrata and Spiraea insularis) Endemic to Ulleung Island, Korea	10.3390/ijms21144933
Potentilla glabra	NC_056926.1	152900	Qinghai, China	The complete chloroplast genome sequence of Potentilla glabra Lodd	10.1080/23802359.2021.1934141
Rubus sachalinensis	NC_056965.1	155787	Qinghai, China	The complete chloroplast genome sequence of Rubus sachalinensis Lévl	10.1080/23802359.2021.1926354
Rubus phoenicolasius	NC_057144.1	155144	Qinghai, China	The complete chloroplast genome of Tibetan medicinal plant Rubus phoenicolasius Maxim	10.1080/23802359.2021.1886013
Rubus irritans	NC_057600.1	155286
Broussonetia kurzii	NC_041637.1	162170
Morus alba	NC_057087.1	159290	Jiangxi, China	The complete chloroplast genome of Morus alba (Moraceae: Morus), the herbal medicine species in China	10.1080/23802359.2019.1638328
